# Supplementary material
Source: MDPI journal article supplement (https://www.mdpi.com/search?q=nanomaterials-09-00583)
Supplement: s001 [file nanomaterials-09-00583-s001.pdf]

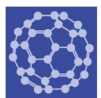

## Supplementary Materials

# TiO<sub>2</sub> Nanostructures for Photoelectrocatalytic Degradation of Acetaminophen

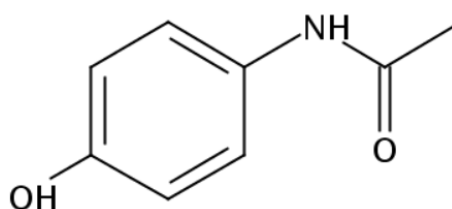

**Figure S1.** Structure of acetaminophen.

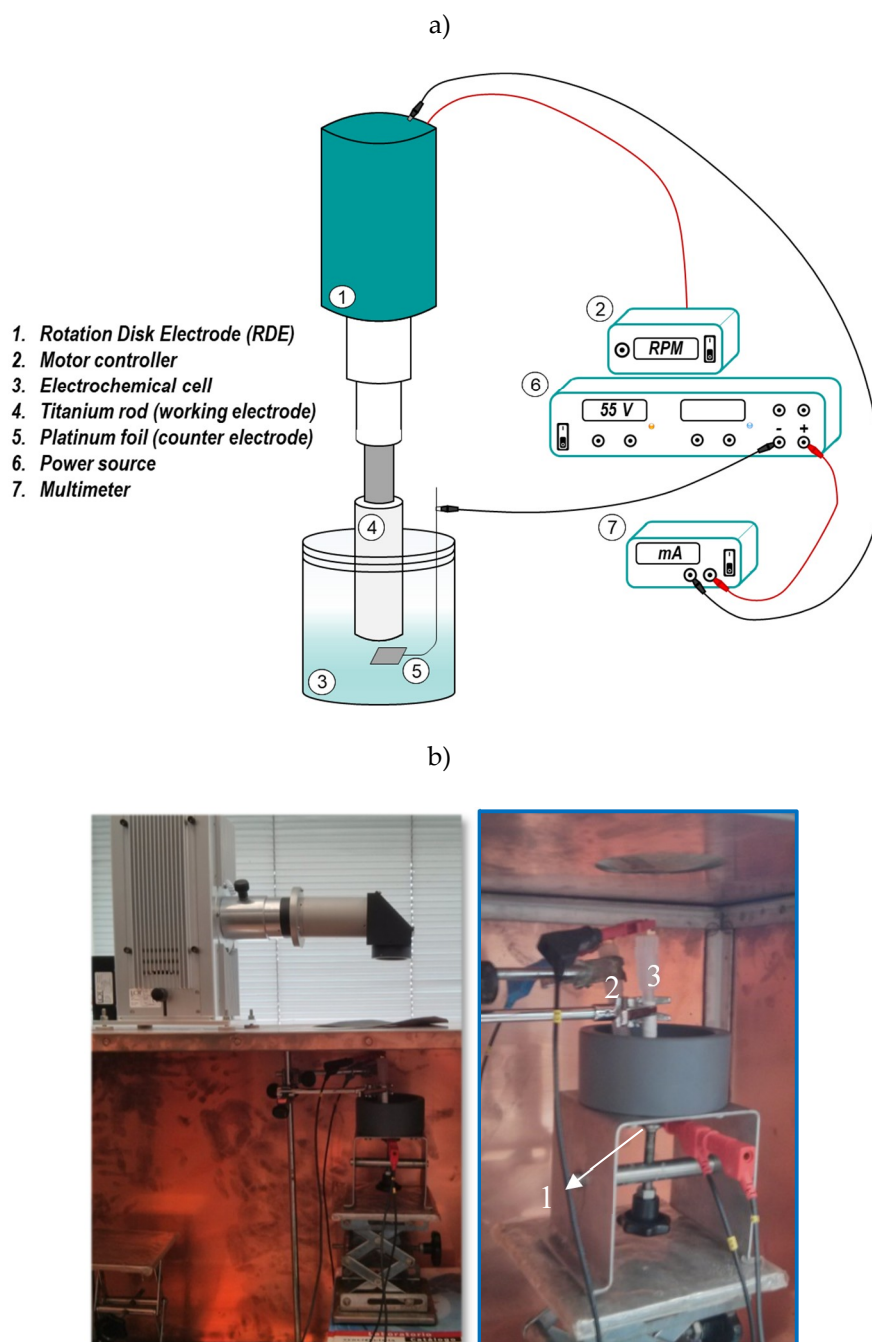

**Figure S2.** (a) Scheme of the electrode configuration during electrochemical anodization. (b) Photograph of the photoelectrochemical setup for electrochemical characterization of the  $\text{TiO}_2$  samples: (1) working electrode, (2) reference electrode, and (3) counter electrode.

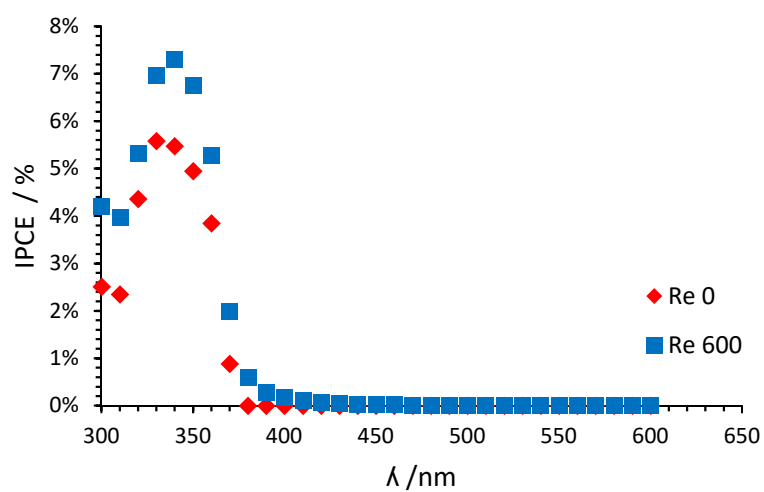

**Figure S3.** Incident photon-to-current efficiency (IPCE) measurements for the nanotubes anodized at  $Re = 0$  (length = 3.7  $\mu\text{m}$ ) and  $Re = 600$  (length = 6.1  $\mu\text{m}$ ).

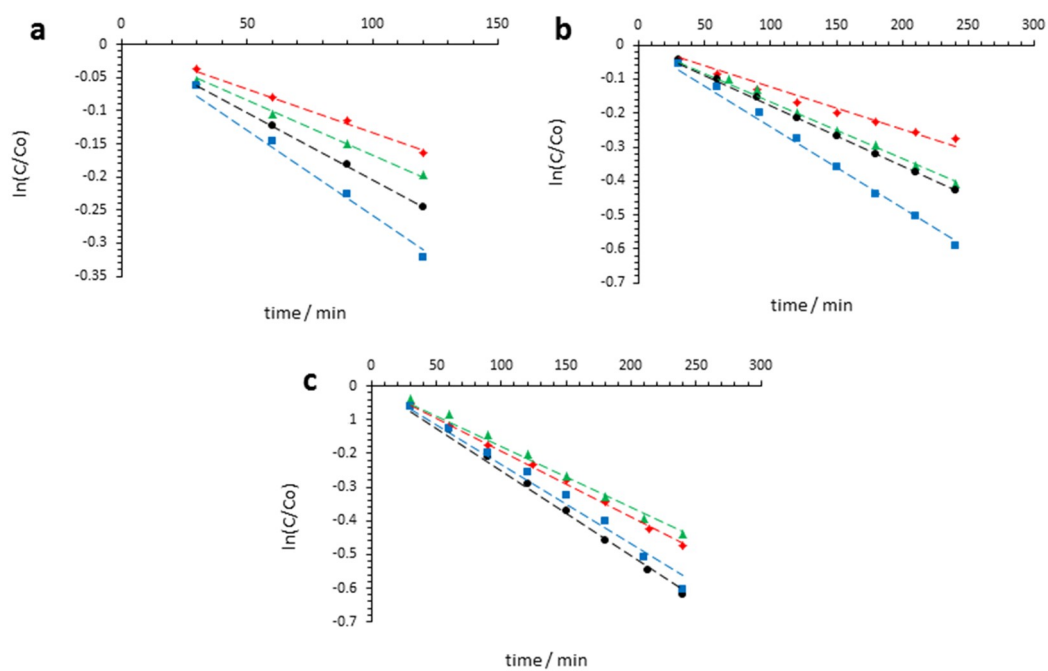

**Figure S4.** Pseudo-first-order kinetics obtained from the fitting of the PEC degradation efficiencies of acetaminophen (Figure 3) with TiO<sub>2</sub> nanostructures anodized (at *Re* 0, 200, 400, and 600 with lengths of 3.7, 5.0, 5.4, and 6.1 μm, respectively) for (a) pH 3, (b) pH 7, and (c) pH 9.
